# Supplementary material for: Selective hydrogenation of 5-hydroxymethylfurfural to 2,5-bis-(hydroxymethyl)furan using Pt/MCM-41 in an aqueous medium: a simple approach
Source: Royal Society of Chemistry journal article supplement (doi:10.1039/c4gc01127a), 2014-01-01

### Supporting information

**Figure S1:** XRD pattern of calcined Pt/MCM-41 (a) before reaction and (b) after 7<sup>th</sup> recycle

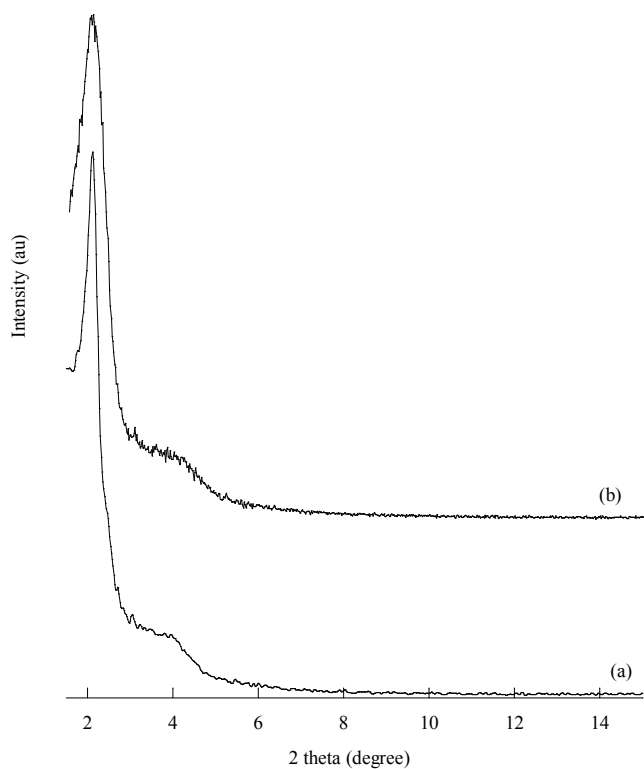

**Figure S2:** TEM image of Pt/MCM-41 (a) calcined and (b) after 7<sup>th</sup> recycle

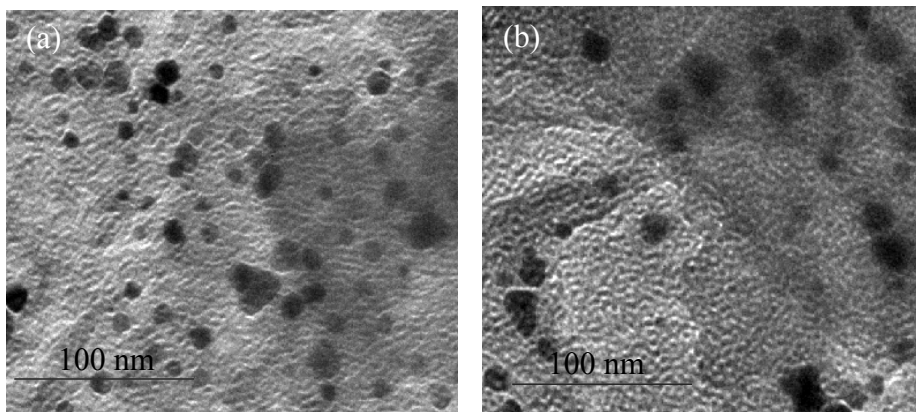

**Figure S3:** Catalyst recycling

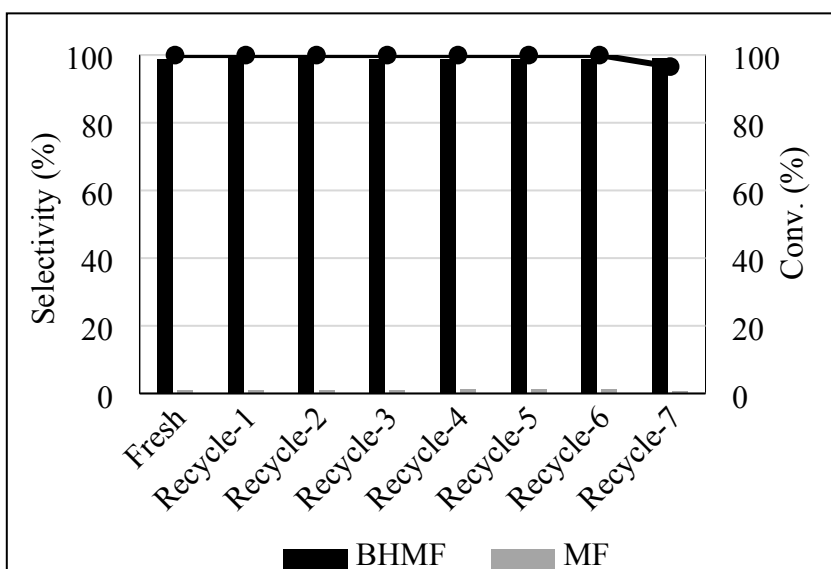

Supplement: c4gc01127a1.pdf [file c4gc01127a1.pdf]
